# Supplementary material for: Purified diet versus whole food diet and the inconsistent results in studies using animal models
Source: Royal Society of Chemistry journal article supplement (doi:10.1039/d1fo04311k), 2022-01-01
Supplement: d1fo04311k1.pdf [file d1fo04311k1.pdf]

## Supplementary Materials

**Supplementary table 1. Purified diet composition of experiment 1**

| Ingredient(g)               | PD-LO | PD-SO |
|-----------------------------|-------|-------|
| Casein                      | 251.2 | 251.2 |
| Dextrin                     | 281.9 | 281.9 |
| Sucrose                     | 249.0 | 249.0 |
| Lard                        | 112.7 | 0     |
| Soybean oil                 | 0     | 112.7 |
| Cellulose                   | 53.9  | 53.9  |
| Mineral, Vitamin            | 51.2  | 51.2  |
| TBHQ                        | 0.00  | 0.02  |
| Total                       | 1000  | 1000  |
| Calorie                     |       |       |
| Caloric density<br>(Kcal/g) | 4.1   | 4.1   |
| Protein<br>(%)              | 22.2  | 22.2  |
| Carbohydrate<br>(%)         | 52.7  | 52.7  |
| Fat<br>(%)                  | 25    | 25    |
| Total<br>(%)                | 100   | 100   |

The different diets were prepared in accordance to the guidelines of Laboratory Animals Nutrients for Formula Feeds [GB 14924.3-2010] of China. PD-LO, purified diet including lard; PD-SO, purified diet including soybean oil;

**Supplementary table 2. Whole foods diet composition of experiment 1**

| Ingredient(g)               | WFD-LO | WFD-SO |
|-----------------------------|--------|--------|
| Basic feed                  | 886    | 886    |
| Casein                      | 43     | 43     |
| Sucrose                     | 1      | 1      |
| Lard                        | 59     | 0      |
| Soybean oil                 | 0      | 59     |
| Cellulose                   | 3      | 3      |
| Mineral, Vitamin            | 9      | 9      |
| TBHQ                        | -      | -      |
| Total                       | 1000   | 1000   |
| Calorie                     |        |        |
| Caloric density<br>(Kcal/g) | 3.7    | 3.7    |
| Protein<br>(%)              | 22     | 22     |
| Carbohydrate<br>(%)         | 53     | 53     |
| Fat<br>(%)                  | 25     | 25     |
| Total<br>(%)                | 100    | 100    |

The composition of basic feed ingredients: corn starch, wheat bran, soybean meal, fish meal, brewer yeast, vegetable oil, salt, lysine, methionine. The different diets were prepared in accordance to the guidelines of Laboratory Animals Nutrients for Formula Feeds [GB 14924.3-2010] of China. WFD-LO, whole foods diet including lard; WFD-SO, whole foods diet including soybean oil.

**Supplementary table 3. Purified diet composition of experiment 2**

| Ingredient(g)               | PD-L  | PD-H  |
|-----------------------------|-------|-------|
| Casein                      | 251.2 | 284.9 |
| Dextrin                     | 281.9 | 198.6 |
| Sucrose                     | 249.0 | 167.3 |
| Lard                        | 112.7 | 230.0 |
| Cellulose                   | 53.9  | 61.2  |
| Mineral, Vitamin            | 51.2  | 58.1  |
| TBHQ                        | 0.00  | 0.00  |
| Total                       | 1000  | 1000  |
| Calorie                     |       |       |
| Caloric density<br>(Kcal/g) | 4.1   | 4.6   |
| Protein<br>(%)              | 22.2  | 22.2  |
| Carbohydrate<br>(%)         | 52.7  | 32.7  |
| Fat<br>(%)                  | 25    | 45    |
| Total<br>(%)                | 100   | 100   |

The different diets were prepared in accordance to the guidelines of Laboratory Animals Nutrients for Formula Feeds [GB 14924.3-2010] of China. PD-L, low-fat purified diet; PD-H, high-fat purified diet.

**Supplementary table 4. Whole foods diet composition of experiment 2**

| Ingredient(g)               | WFD-L | WFD-H |
|-----------------------------|-------|-------|
| Basic feed                  | 886   | 644   |
| Casein                      | 43    | 134   |
| Sucrose                     | 1     | 1     |
| Lard                        | 59    | 185   |
| Cellulose                   | 3     | 1     |
| Mineral, Vitamin            | 9     | 27    |
| TBHQ                        | -     | -     |
| Total                       | 1000  | 1000  |
| Calorie                     |       |       |
| Caloric density<br>(Kcal/g) | 3.7   | 4.3   |
| Protein<br>(%)              | 22    | 22    |
| Carbohydrate<br>(%)         | 53    | 33    |
| Fat<br>(%)                  | 25    | 45    |
| Total<br>(%)                | 100   | 100   |

The composition of basic feed ingredients: corn starch, wheat bran, soybean meal, fish meal, brewer yeast, vegetable oil, salt, lysine, methionine. The different diets were prepared in accordance to the guidelines of Laboratory Animals Nutrients for Formula Feeds [GB 14924.3-2010] of China. WFD-L, low-fat whole foods diet; WFD-H, high-fat whole foods diet.

**Supplementary table 6. Antibody information**

| Reagent                                                         | Manufacturer            | Article number     |
|-----------------------------------------------------------------|-------------------------|--------------------|
| SREBF1 Antibody (SREBP-1c)                                      | CUSABIO BIOTECH CO.,Ltd | CSB-PA022657LA01HU |
| FABP2 Antibody                                                  | CUSABIO BIOTECH CO.,Ltd | CSB-PA133408       |
| DGAT2 Antibody                                                  | CUSABIO BIOTECH CO.,Ltd | CSB-PA850407LA01HU |
| SLC5A1 Antibody (SGLT1)                                         | CUSABIO BIOTECH CO.,Ltd | CSB-PA021675LA01HU |
| HMGCS1 Polyclonal Antibody                                      | Proteintech Group, Inc. | 17643-1-AP         |
| GLUT2 Polyclonal Antibody                                       | Proteintech Group, Inc. | 20436-1-AP         |
| HRP-conjugated goat anti-rabbit<br>universal secondary antibody | DAKO                    | K5007              |

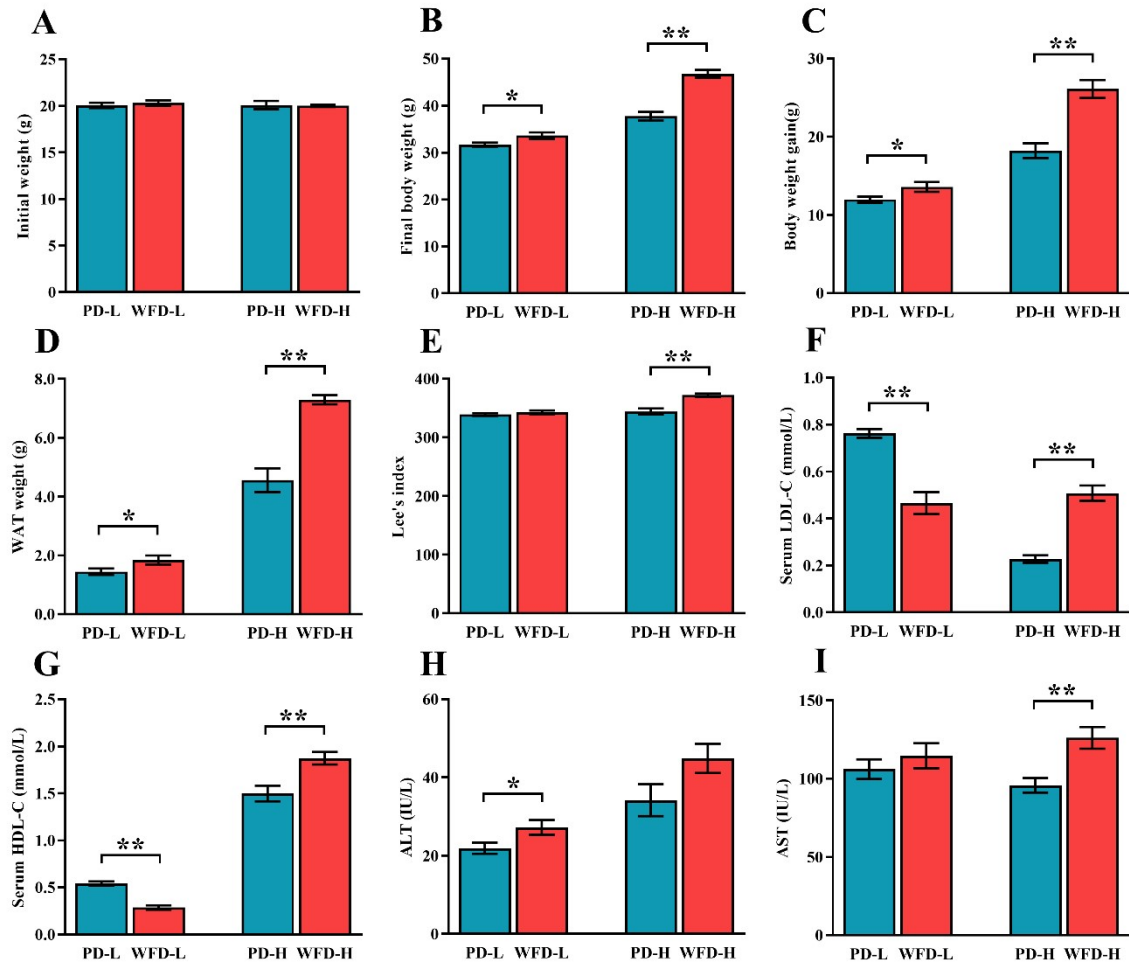

**Supplementary Figure 1. Effect of dietary patterns on growth and metabolic performance in mice.** (A) Initial weight; (B) body weight; (C) body weight gain; (D) perirenal fat and epididymal fat pads weight at the end of the 16-week period; (E) lee's index; (F and G) serum LDL-cholesterol (LDL-C) and HDL-cholesterol (HDL-C); (H) the serum enzyme activity of alanine aminotransferase (ALT); (I) the serum enzyme activity of aspartate aminotransferase (AST). All data are represented as mean  $\pm$  SEM. Data were analyzed using independent sample t-tests. \* $p < 0.05$ ; \*\* $p < 0.01$  for PD-L versus WFD-L or PD-H versus WFD-H. PD-L, low-fat purified diet,  $n = 15$ ; WFD-L, low-fat whole foods diet,  $n = 14$ ; PD-H, high-fat purified diet,  $n = 12$ ; WFD-H, high-fat whole foods diet,  $n = 15$ ; WAT, white adipose tissue.
